# Supplementary material
Source: PubMed Central journal article supplement (PMC3026419)
Supplement: supp_138.4.787_DEV058974TableS1.pdf [file supp_138.4.787_DEV058974TableS1.pdf]

**Table S1. Primers for qPCR**

| Name         | Sequence (5' to 3')                 |
|--------------|-------------------------------------|
| ndr2-10000-F | AACGTTTCAGCATCCATATTACGA            |
| ndr2-10000-R | AATTCAGACTGGACTTTGCATATCTTT         |
| ndr2-8700-F  | CAGGGCAAAGCATAAAACAAATATT           |
| ndr2-8700-R  | GCACAGCTATGTAAACTATTAAGATATACTTGATG |
| ndr2-8100-F  | CGGCCACCTCAGTTCAC                   |
| ndr2-8100-R  | GAATTTCTAAAGCAGCAGTTTTCTTG          |
| ndr2-7000-F  | TTCGCGAACGAGTTGTTCTG                |
| ndr2-7000-R  | AATCTTTCTTCAACTTCGCATCATC           |
| ndr2-6300-F  | GCTCGACGCAGAAAGTTGAAC               |
| ndr2-6300-R  | GCAGCGCTTCTGGTATTGAAG               |
| ndr2-5200-F  | CACACCGCGCTGATGAGAT                 |
| ndr2-5200-R  | AAACACGGGCTCGAAACG                  |
| ndr2-4100-F  | CCCCTGCTGGCCTCACTA                  |
| ndr2-4100-R  | CCTGGATGGGAGACCAAATG                |
| ndr2-3000-F  | CCCAGATTAAGTCGAAGGAAAGTTA           |
| ndr2-3000-R  | TCCTTTAAACATTGCTGCTTTTGT            |
| ndr2-2000-F  | CAATTTATGAAAGCACATGCCAATA           |
| ndr2-2000-R  | CACGTGTGCTGTCAAATTGATG              |
| ndr2-1000-F  | CCACCAACTTATCCAGCATATGTT            |
| ndr2-1000-R  | GGACAATTTTAGCTTACCCGATTC            |
| ndr2+1-F     | AATGTCCTCTGCTACTTGTTAAATATGC        |
| ndr2+1-R     | GAGTCCCGGGCGCTTTATA                 |
| ndr2+1800-F  | CACACCGCGCTGATGAGAT                 |
| ndr2+1800-R  | AAACACGGGCTCGAAACG                  |
| ndr2+4000-F  | GCGGGCTGACTGAAATTAATA               |
| ndr2+4000-R  | GTATTGCCTCTTCTGTTGAATCATT           |
| ndr2+7000-F  | ACCACTACGTGGCGATCTTTG               |
| ndr2+7000-R  | AGCTCCGCTGCCTGAATCT                 |
| ndr2+8000-F  | CAGAGAACACCACTGCACAAGAG             |
| ndr2+8000-R  | CCATCCGATCTGGTTAAAATCC              |
| ndr1-9900-F  | CAGCTGGGAGGGCATCTG                  |
| ndr1-9900-R  | CACCACAGCGGAATGAACTG                |
| ndr1-9000-F  | TGTGGAGGAAACTCGCATGA                |
| ndr1-9000-R  | TCCTGGCTGGGTCAATTTCT                |
| ndr1-8100-F  | GCAGTGAGGTCAGGGCTTTATT              |
| ndr1-8100-R  | AGGTAACGATCACCTGCATTTTC             |
| ndr1-7000-F  | TGTGTGTCGGTCAAGAATGGA               |
| ndr1-7000-R  | GCGTGGTCTATTTTAGTTCCTCAA            |
| ndr1-6100-F  | GCGCTGCAAATGGTTTGATT                |
| ndr1-6100-R  | GGCAGACTTTGTAAGTGGAAAAACT           |
| ndr1-5000-F  | GGCGGGATCGATTTTGG                   |
| ndr1-5000-R  | GCATGGTGTCCACAACACTCTT              |
| ndr1-3900-F  | GCGATCTCTCCAGCTGCTGTA               |
| ndr1-3900-R  | CCAGTGAGATTGTGCTGTTTGATT            |
| ndr1-2900-F  | TGGCCAAAACCAAAGGTGTT                |
| ndr1-2900-R  | TCACAACCTGTCATGATTTGAGCAT           |
| ndr1-2000-F  | CCCATGGGCTCATTGTAACC                |
| ndr1-2000-R  | CCAACCTTATCCATCTTCTCTCTTC           |
| ndr1-1000-F  | TGTTAAGAATGGCCAATGATGAA             |
| ndr1-1000-R  | TTGTGGATTAACACTGATCTGTCTGT          |
| ndr1+100-F   | GGTGAGCTGCACGGGAAA                  |
| ndr1+100-R   | GCCAGCTGCTCGCATTTT                  |
| ndr1+1100-F  | GAAGCCCCTGCGAAGAAGT                 |
| ndr1+1100-R  | AGGTTGAGTTAATCGGGTTTGC              |
| ndr1+1900-F  | AATGCGGCTGCCACTGA                   |
| ndr1+1900-R  | CGAGGAGCATATCCAAAGTGCTA             |
| ndr1+2600-F  | TCGATGTGCTCAGGATGCA                 |
| ndr1+2600-R  | TCTCGACATCAGCTAACACTGTTG            |
